# Supplementary material for: Efficacy of Individual Bacteriophages Does Not Predict Efficacy of Bacteriophage Cocktails for Control of Escherichia coli O157
Source: PubMed Central journal article supplement (PMC7943454; doi:10.3389/fmicb.2021.616712), 2021-02-24

**Figure S2.** Plaque morphology of Phage T1 yielded by overlay plaque assay

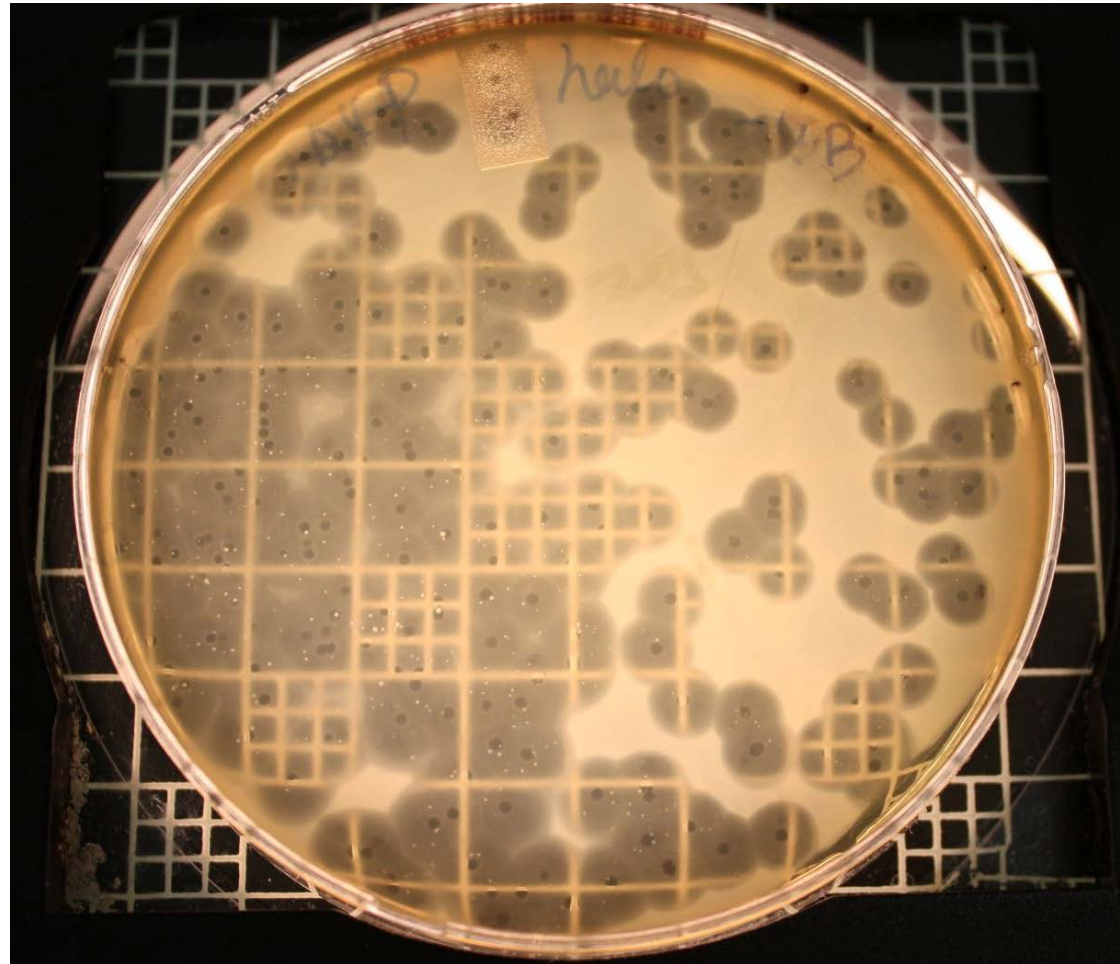

Supplement: Image_2.pdf [file Image_2.pdf]
